# Supplementary material for: Role of radicals in the reaction of oxygen difluoride with monohydrogenated silicon
Source: Royal Society of Chemistry journal article supplement (doi:10.1039/d4cp03375b), 2024-11-27
Supplement: d4cp03375b1.pdf [file d4cp03375b1.pdf]

## Role of Radicals in the Reaction of Oxygen Difluoride with Monohydrogenated Silicon Supporting Information

Henry Thake and Stephen J. Jenkins  
*Yusuf Hamied Department of Chemistry, University of Cambridge,  
Lensfield Road, Cambridge CB2 1EW, United Kingdom*  
(Dated: December 2, 2024)

## TIME-EVOLUTION OF REACTIVE TRAJECTORIES

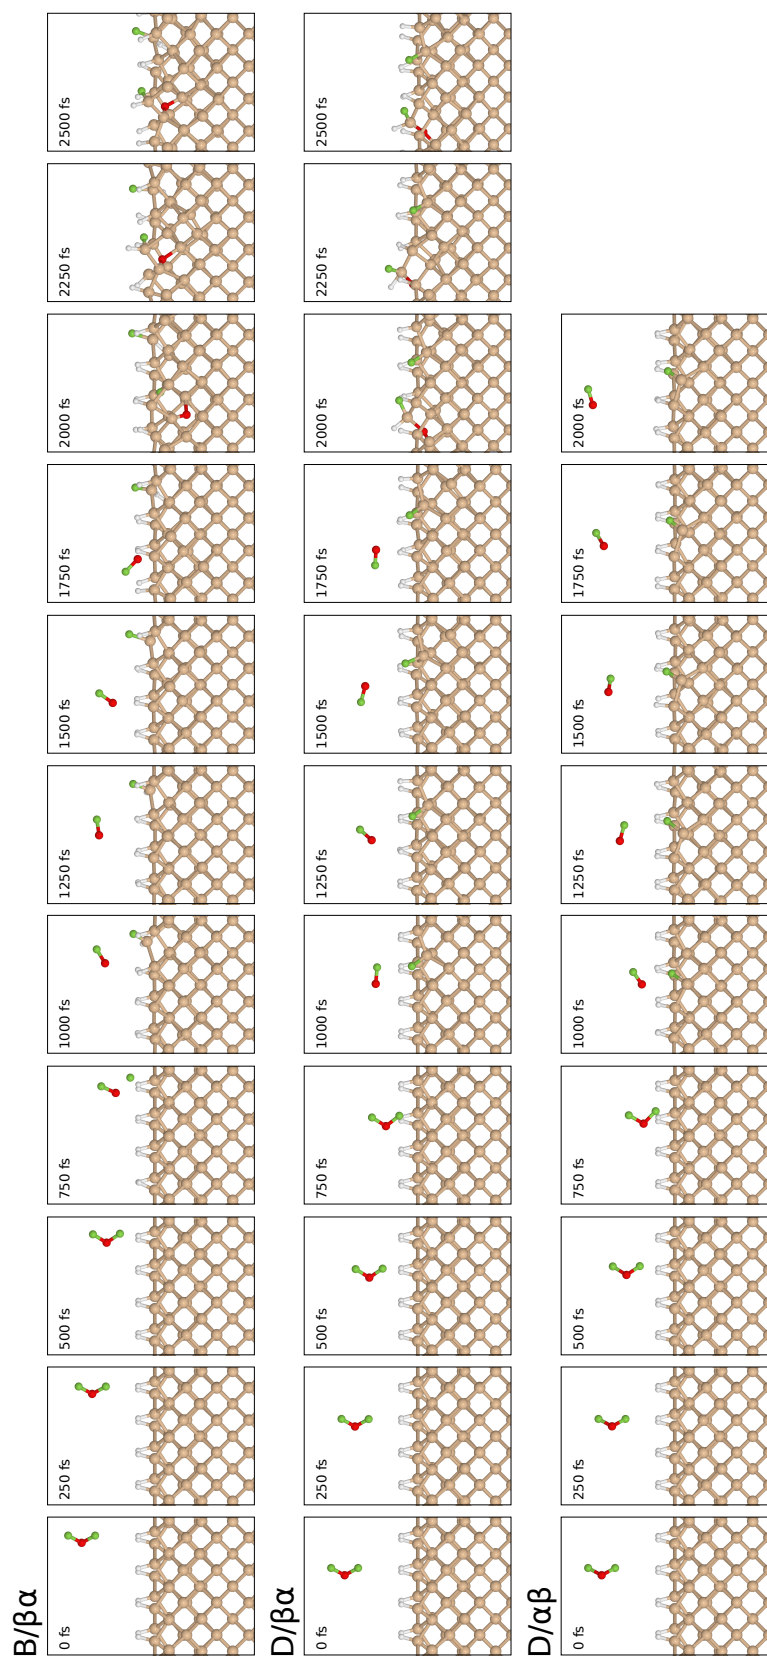

**Figure S1:** Snapshots of the reactive trajectories calculated in this work. Compared with Fig. 3 of the paper, images here are uniformly distributed in time and more densely spaced .
